# Supplementary material for: Next-generation risk assessment read-across case study: application of a 10-step framework to derive a safe concentration of daidzein in a body lotion
Source: Front Pharmacol. 2024 Jun 19;15:1421601. doi: 10.3389/fphar.2024.1421601 (PMC11220827; doi:10.3389/fphar.2024.1421601)
Supplement: Supplementary file 2 [file Table1.XLSX]

## Sheet: AQ_Report All
Supplementary Materials S2: Justification of the use of genistein as a source chemical for daidzein using ToxGPS
			Target	Analog	Analog	Analog	Analog	Analog	Analog	Analog	Analog	Analog	Analog	Analog	Analog	Analog	Analog	Analog	Analog	Analog	Analog	Analog	Analog
Compound Information
	Summary		CMS-2257	CMS-2255	CMS-22259	CMS-2350	CMS-2349	CMS-53416	CMS-2414	CMS-23622	CMS-52606	CMS-2311	CMS-2258	CMS-47856	CMS-14036	CMS-61928	CMS-55030	CMS-20081	CMS-49921	CMS-44042	CMS-8222	CMS-45017	CMS-18716
Data Overview
	Names & Identifiers
		Names	DAIDZEIN (DSSTOX,US FDA CFSAN Thesaurus)	5,7-DIHYDROXY-3-(4-HYDROXYPHENYL)-4-BENZOPYRONE (COSING)|GENISTEIN (DSSTOX,US FDA CFSAN Thesaurus,COSING,PCPC)	2',4',7-TRIHYDROXYISOFLAVONE (US FDA CFSAN Thesaurus)	4',6,7-TRIHYDROXYISOFLAVONE (DSSTOX)	3',4',7-TRIHYDROXYISOFLAVONE (DSSTOX)	OROBOL (US FDA CFSAN Thesaurus)	PRUNETIN (DSSTOX)	CALYCOSIN (US FDA CFSAN Thesaurus)	4H-1-BENZOPYRAN-4-ONE, 7-HYDROXY-3-(4-HYDROXYPHENYL)-6-METHOXY- (CAS)|GLYCITEIN (US FDA CFSAN Thesaurus)	BIOCHANIN (US FDA CFSAN Thesaurus)|BIOCHANIN A (DSSTOX)	7-HYDROXY-3-(4-METHOXYPHENYL)-4-BENZOPYRONE (COSING)|FORMONONETIN (DSSTOX,US FDA CFSAN Thesaurus,COSING)	4H-1-BENZOPYRAN-4-ONE, 7-HYDROXY-3-(4-HYDROXY-3,5-DIMETHOXYPHENYL)- (CAS)	ISOFLAVONE (PUBLICATION,US FDA CFSAN Thesaurus)	ALFALONE (ISOFLAVONE) (CHEMIDPLUS)	AFROMOSIN (CHEMIDPLUS)	4',7-DIMETHOXYISOFLAVONE (US FDA CFSAN Thesaurus)	5,7-DIMETHOXYISOFLAVONE (US FDA CFSAN Thesaurus)	4',5,7-TRIMETHOXYISOFLAVONE (CHEMIDPLUS)	IPRIFLAVONE (DSSTOX,US FDA CFSAN Thesaurus)	4H-1-BENZOPYRAN-4-ONE, 7-(ACETYLOXY)-3-(4-METHOXYPHENYL)- (CAS)|7-(ACETYLOXY)-3-(4-METHOXYPHENYL)-4H-1-BENZOPYRAN-4-ONE (CHEMIDPLUS)|ISOFLAVONE, 7-HYDROXY-4'-METHOXY-, ACETATE (7CI,8CI) (NOT SPECIFIED)	PSEUDOBAPTIGENIN (US FDA CFSAN Thesaurus)
		Registry Numbers	486-66-8	446-72-0	7678-85-5	17817-31-1	485-63-2	480-23-9	552-59-0	20575-57-9	40957-83-3	491-80-5	485-72-3	195445-59-1	574-12-9	970-48-9	550-79-8	1157-39-7	26964-35-2	1162-82-9	35212-22-7	13293-49-7	90-29-9
Chemical Similarity
	Tanimoto
		RDKit Mol		0.89	0.88	0.93	0.93	0.84	0.83	0.87	0.86	0.85	0.94	0.84	0.89	0.86	0.86	0.93	0.82	0.82	0.89	0.87	0.82
		RDKit MACCS		0.96	0.96	0.93	0.93	0.90	0.90	0.87	0.87	0.87	0.86	0.84	0.81	0.81	0.81	0.80	0.80	0.77	0.77	0.75	0.74
		RDKit Morgan		0.85	0.88	0.91	0.94	0.80	0.70	0.77	0.74	0.70	0.81	0.74	0.69	0.70	0.70	0.70	0.56	0.60	0.65	0.57	0.75
		ToxPrint		0.96	1.00	1.00	1.00	0.96	0.96	1.00	1.00	0.96	1.00	1.00	0.84	1.00	1.00	0.88	0.80	0.83	0.81	0.81	0.86
		Liver BioPath		0.88	0.88	0.88	1.00	0.88	0.78	0.89	0.78	0.78	0.89	0.78	0.36	0.78	0.78	0.56	0.25	0.44	0.31	0.42	0.80
		Skin Metabolism Substrates		1.00	1.00	1.00	1.00	1.00	1.00	1.00	1.00	1.00	1.00	1.00	0.33	1.00	1.00	0.33	0.33	0.33	0.33	0.20	1.00
Skyline Plots
	Skyline_MP
		Skyline
		Pearson similarity (0-1)		0.92	0.90	0.93	0.92	0.80	0.94	0.94	0.95	0.95	0.96	0.85	0.81	0.91	0.92	0.88	0.85	0.83	0.81	0.86	0.96
Analog Quality	Chemical similarity (TC: MACCS+ToxPrint) + Skyline Molecular properties (Pearson Similarity)			0.95	0.95	0.95	0.95	0.88	0.93	0.93	0.94	0.92	0.94	0.89	0.82	0.90	0.90	0.85	0.82	0.81	0.79	0.81	0.84

## Sheet: AQ_Report +ToxCast
Supplementary Materials S2: Justification of the use of genistein as a source chemical for daidzein using ToxGPS
			Target	Analog	Analog	Analog	Analog
Compound Information
	Summary		CMS-2257	CMS-2255	CMS-2311	CMS-2258	CMS-8222
Data Overview
	Names & Identifiers
		Names	DAIDZEIN (DSSTOX,US FDA CFSAN Thesaurus)	5,7-DIHYDROXY-3-(4-HYDROXYPHENYL)-4-BENZOPYRONE (COSING)|GENISTEIN (DSSTOX,US FDA CFSAN Thesaurus,COSING,PCPC)	BIOCHANIN (US FDA CFSAN Thesaurus)|BIOCHANIN A (DSSTOX)	7-HYDROXY-3-(4-METHOXYPHENYL)-4-BENZOPYRONE (COSING)|FORMONONETIN (DSSTOX,US FDA CFSAN Thesaurus,COSING)	IPRIFLAVONE (DSSTOX,US FDA CFSAN Thesaurus)
		Registry Numbers	486-66-8	446-72-0	491-80-5	485-72-3	35212-22-7
Chemical Similarity
	Tanimoto
		RDKit Mol		0.89	0.85	0.94	0.89
		RDKit MACCS		0.96	0.87	0.86	0.77
		RDKit Morgan		0.85	0.70	0.81	0.65
		ToxPrint		0.96	0.96	1.00	0.81
		Liver BioPath		0.88	0.78	0.89	0.31
		Skin Metabolism Substrates		1.00	1.00	1.00	0.33
Skyline Plots
	Skyline_MP
		Skyline
		Pearson similarity (0-1)		0.92	0.95	0.96	0.81
TOX21CAST
	Androgen Metabolism Process (15), Estrogen Metabolic Process (23), Thyroid Hormone Metabolic Process (13)
		Skyline
		Pearson similarity (0-1)		0.92	0.90	0.93	0.65
Analog Quality	Chemical similarity (TC: MACCS+ToxPrint) + Skyline Molecular properties (Pearson Similarity)+TOX21CAST			0.94	0.92	0.94	0.76

## Sheet: Comparison Matrix
Supplementary Materials S2: Justification of the use of genistein as a source chemical for daidzein using ToxGPS
